# Supplementary material for: Mammalian WTAP is a regulatory subunit of the RNA N6-methyladenosine methyltransferase
Source: PubMed Central journal article supplement — Cell Res. 2014 Jan 10;24(2):177–89. doi: 10.1038/cr.2014.3 (PMC3915904; doi:10.1038/cr.2014.3), 2014-01-10
Supplement: cr20143x1.pdf [file cr20143x1.pdf]

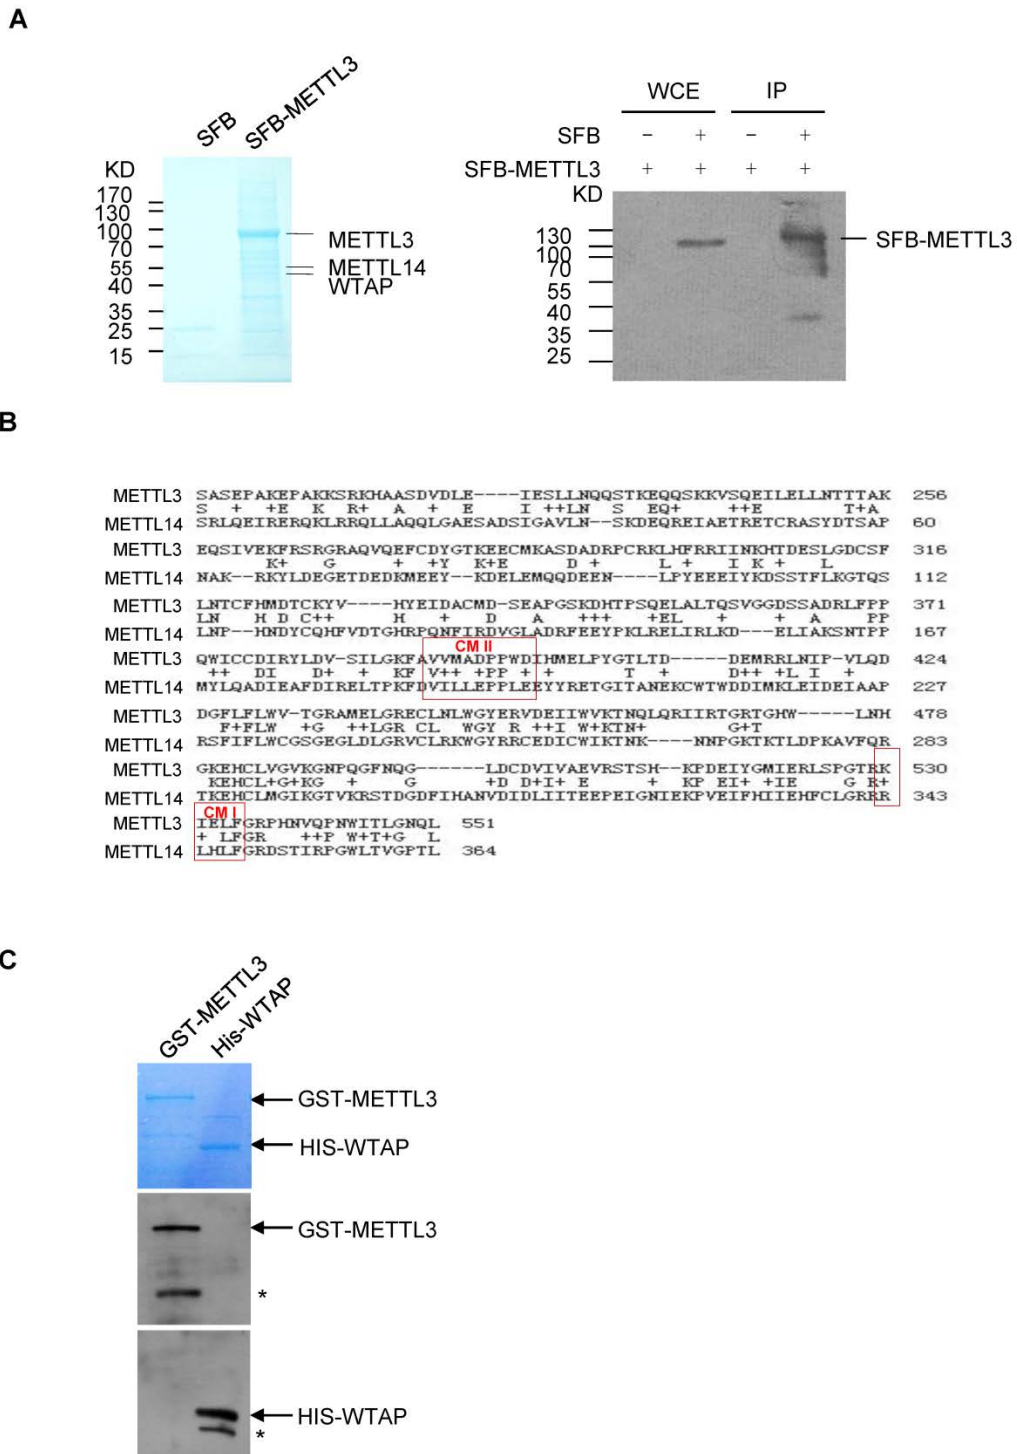

**Supplementary information, Figure S1** (Related to Figure 1) Identification of WTAP and METTL14 as METTL3 associating proteins. **(A)** 293T cells were transfected with SFB or SFB-METTL3 plasmids for 40 hrs and the lysates were precipitated first with Streptavidin sepharose beads and then with S-protein agarose beads. The samples were separated by SDS-PAGE and protein bands were visualized by Coomassie blue staining (Left panel). Western blot (anti-Flag antibody) validation of SFB-METTL3 pull down shown in (A) (Right panel). **(B)** Alignment of human METTL3 and

METTL14 demonstrated 43% identity and that METTL14 contains motifs similar to the ones which has been shown to be essential for catalytic activity in METTL3 (CM II is the catalytic domain and CM I is the methyl donor SAM binding domain). (C) Purified recombinant GST-METTL3 and His-WTAP were separated by SDS-PAGE and protein bands were visualized by Coomassie blue staining (Upper panel) and validated by western blotting (anti-GST antibody, middle panel; anti-His antibody, lower panel). \*, degradation product.
