# Supplementary material for: Mammalian WTAP is a regulatory subunit of the RNA N6-methyladenosine methyltransferase
Source: PubMed Central journal article supplement — Cell Res. 2014 Jan 10;24(2):177–89. doi: 10.1038/cr.2014.3 (PMC3915904; doi:10.1038/cr.2014.3), 2014-01-10
Supplement: cr20143x3.pdf [file cr20143x3.pdf]

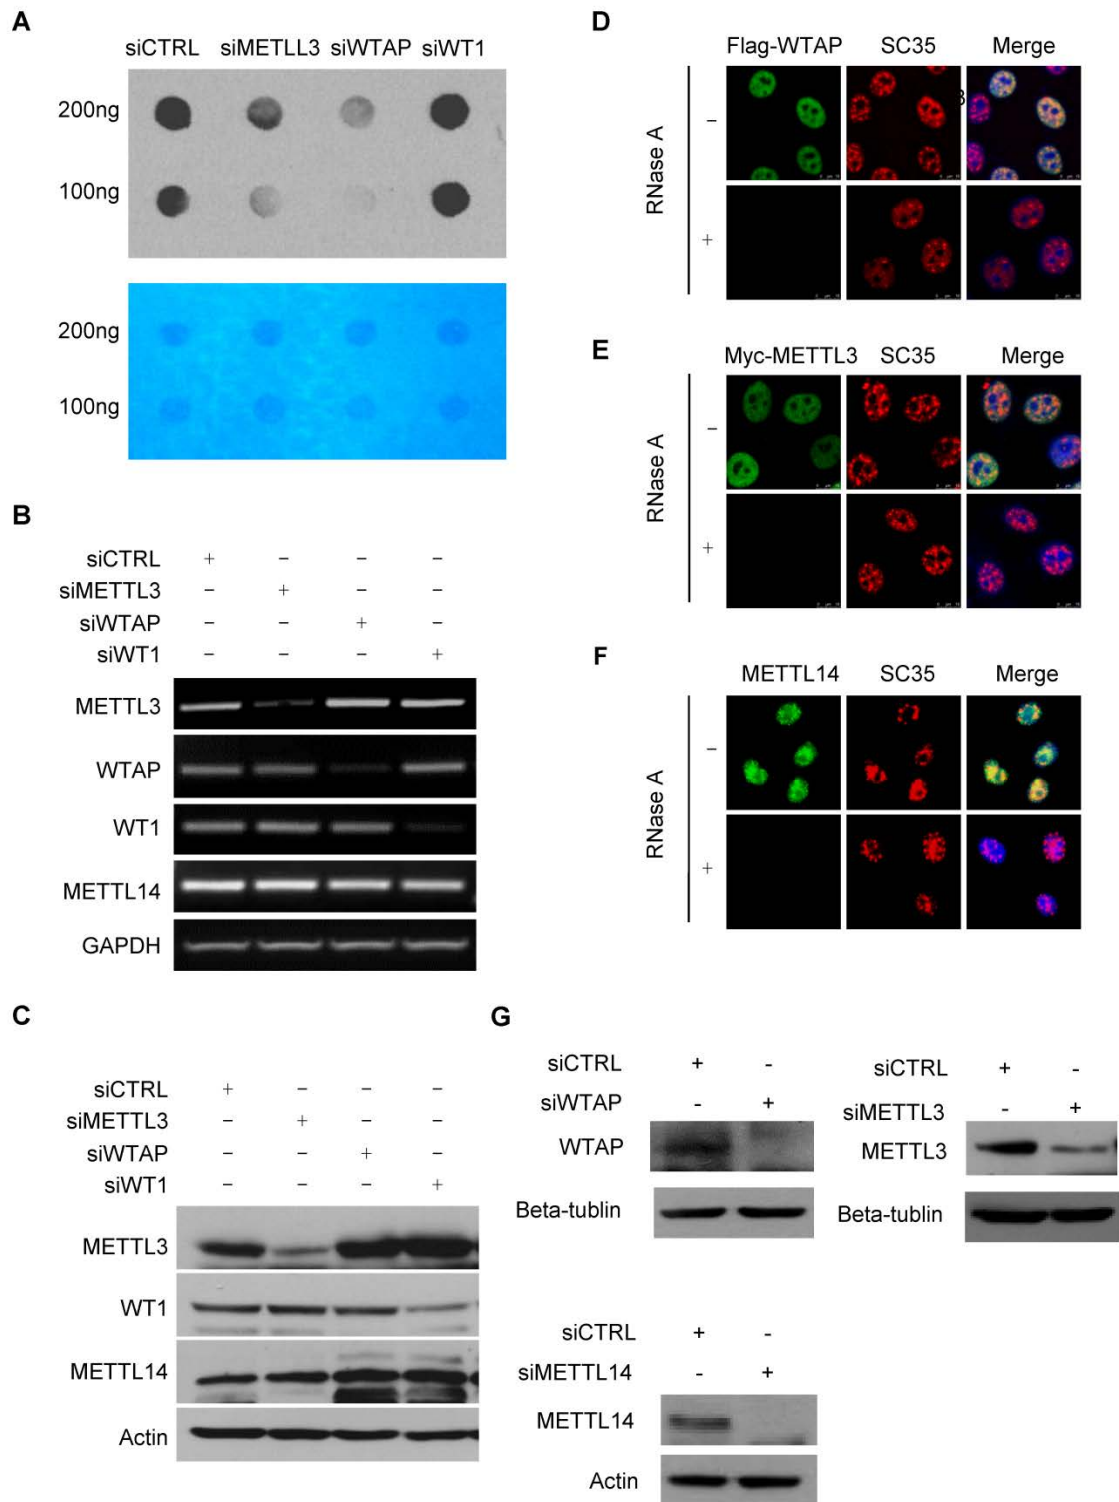

**Supplementary information, Figure S3** (Related to Figure 2) WTAP is essential for in vivo methyltransferase activity; localization of METTL3, METTL14 and WTAP in nuclear speckles requires RNA: METTL3/WTAP/METTL14 knockdown efficiency detected by Western blot and RT-PCR. (Related to Figure 2) (A) 293T cells were transfected with control, METTL3, WTAP or WT1 siRNA as indicated. mRNA

was extracted and 200 or 100 ng were spotted onto nylon membrane and m6A levels were detected with anti-m6A antibody. Methylene Blue staining (lower panel) was performed to verify that equal amounts of mRNA had been spotted. **(B)** and **(C)** siRNA specificity and efficiency for samples used in (A) were examined by RT-PCR **(B)** and western blot analysis **(C)**. **(D-F)** HeLa cells were transfected with Flag-WTAP or Myc-METTL3 for 24 hrs then the cells were treated for 7 min with RNase A (1mg/ml)(diluted in PBS) in 37°C or not after being fixed and permeabilized, then stained with the indicated antibodies. **(G)** Western blots showing knock down efficiency of siMETTL3, siMETTL14 and siWTAP used in the immunofluorescence experiments shown in Figure 2B-D. .
