# Supplementary material for: Mammalian WTAP is a regulatory subunit of the RNA N6-methyladenosine methyltransferase
Source: PubMed Central journal article supplement — Cell Res. 2014 Jan 10;24(2):177–89. doi: 10.1038/cr.2014.3 (PMC3915904; doi:10.1038/cr.2014.3), 2014-01-10
Supplement: cr20143x4.pdf [file cr20143x4.pdf]

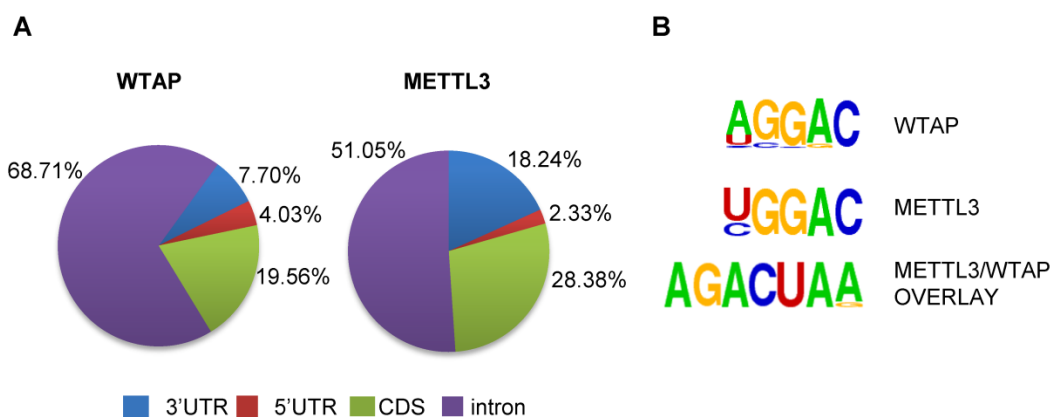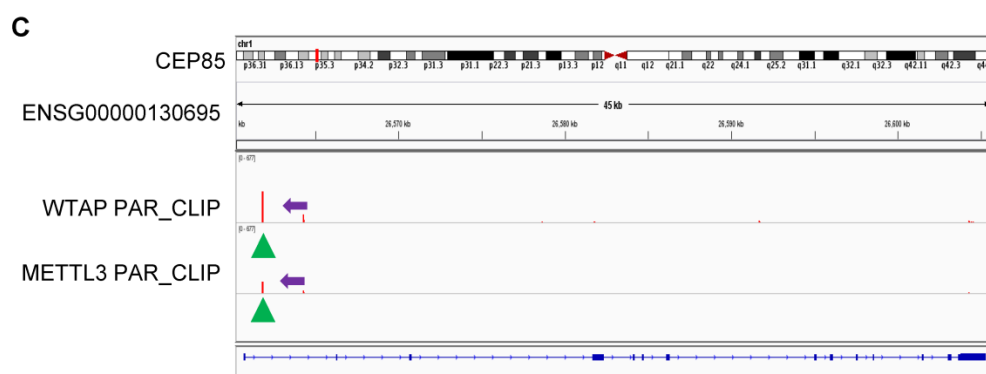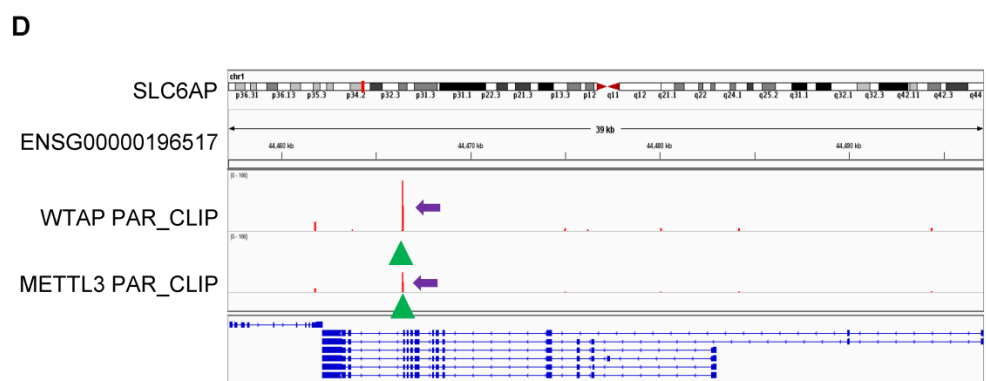

**Supplementary information, Figure S4** (related to Figure 3) (A) Distribution of mRNA binding regions based on PAR-CLIP sequence clusters for WTAP and METTL3 without normalization of the overall length of the different transcript regions.(B) Other enriched sequence motif of PAR-CLIP binding clusters. WTAP binding motif (Upper panel,  $p=1e-12$ ); METTL3 binding motif (Middle panel,  $p=1e-12$ ); Binding motif when only including genes found in both WTAP and METTL3 binding clusters (Lower panel,  $p=1e-10$ ). Binding Motifs were generated by the HOMER program. (C-D) Representative profiles showing the overlapped distribution of WTAP/METTL3 clusters and m6A sites in the CEP85 (C) and

SLC6AP (D) genes. Arrows show WTAP/METTLL3 binding cluster location. Green triangles represents m6A site.
